# Supplementary material for: Insights into SusCD-mediated glycan import by a prominent gut symbiont
Source: Springer Nature journal article supplement (doi:10.1038/s41467-020-20285-y), 2021-01-04
Supplement: MOESM1 [file 41467_2020_20285_MOESM1_ESM.pdf]

## Supplementary Information

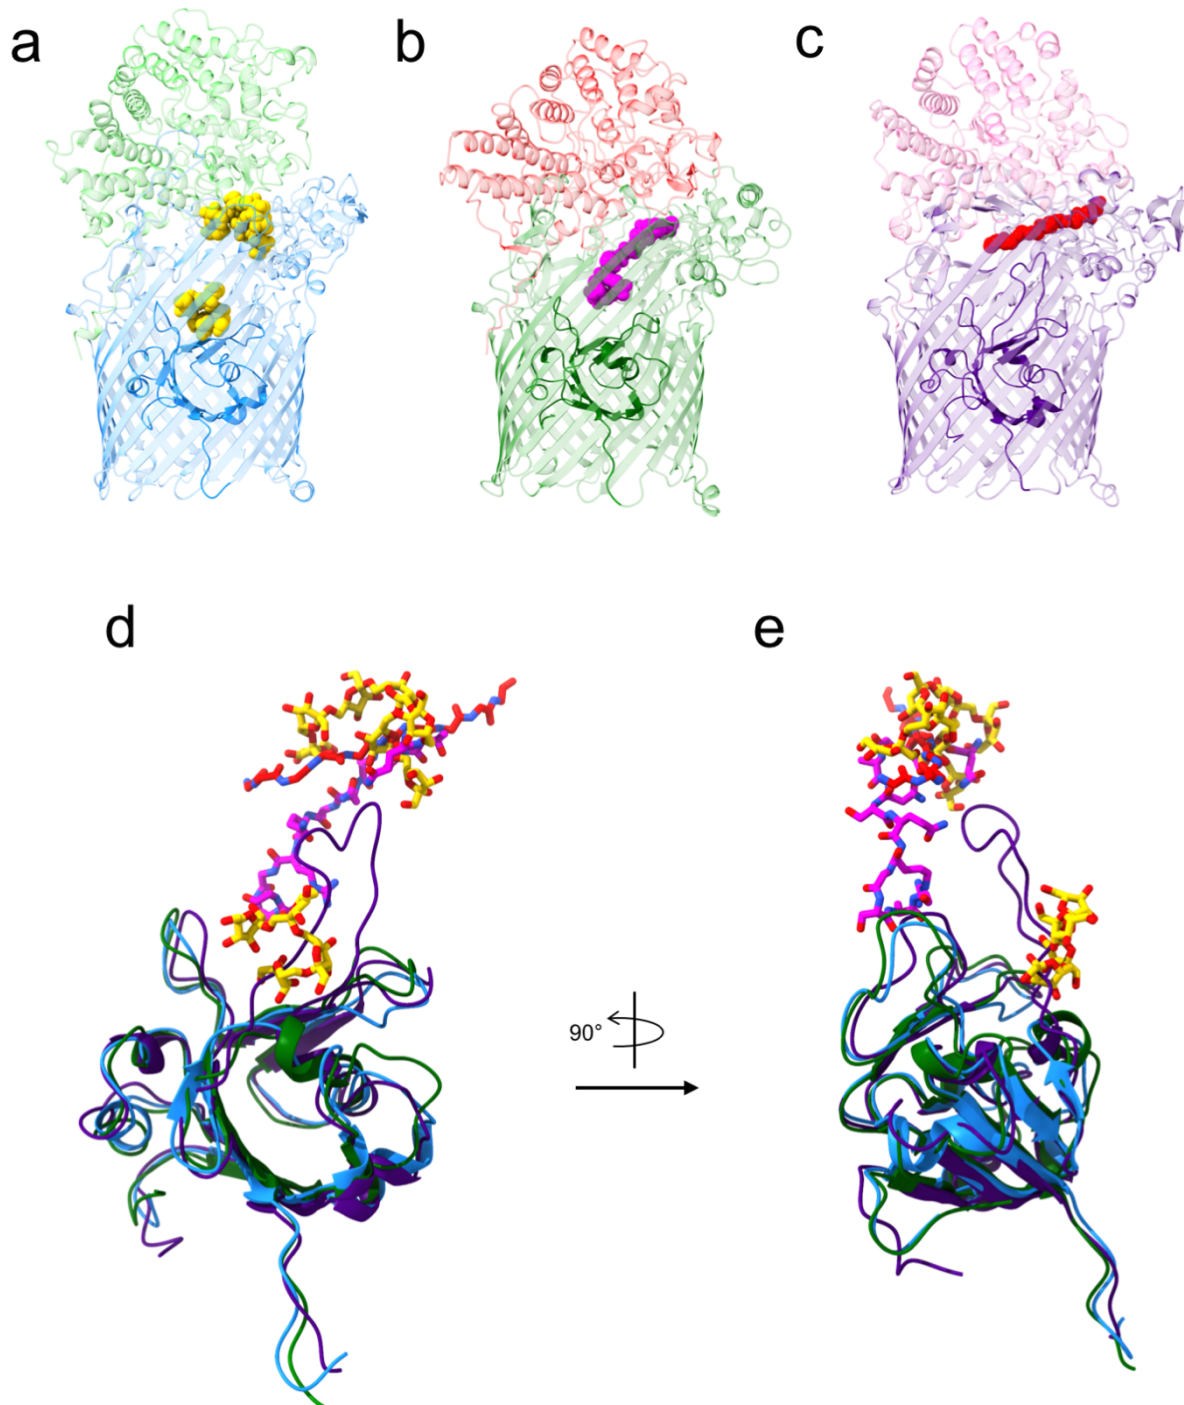

**Supplementary Figure 1** Comparison of SusCD ligand binding sites. **a-c**, Cartoon representations of (a) Bt1762-63 with bound FOS (yellow), (b) *Porphyromonas gingivalis* RagAB with bound peptide (magenta; PDB ID 6SLN), and (c) Bt2263-64 with bound peptide (red; PDB ID 5FQ8). The bottom panels show close-up views of the plugs and ligands from the membrane plane, rotated 90° between **d** and **e**.

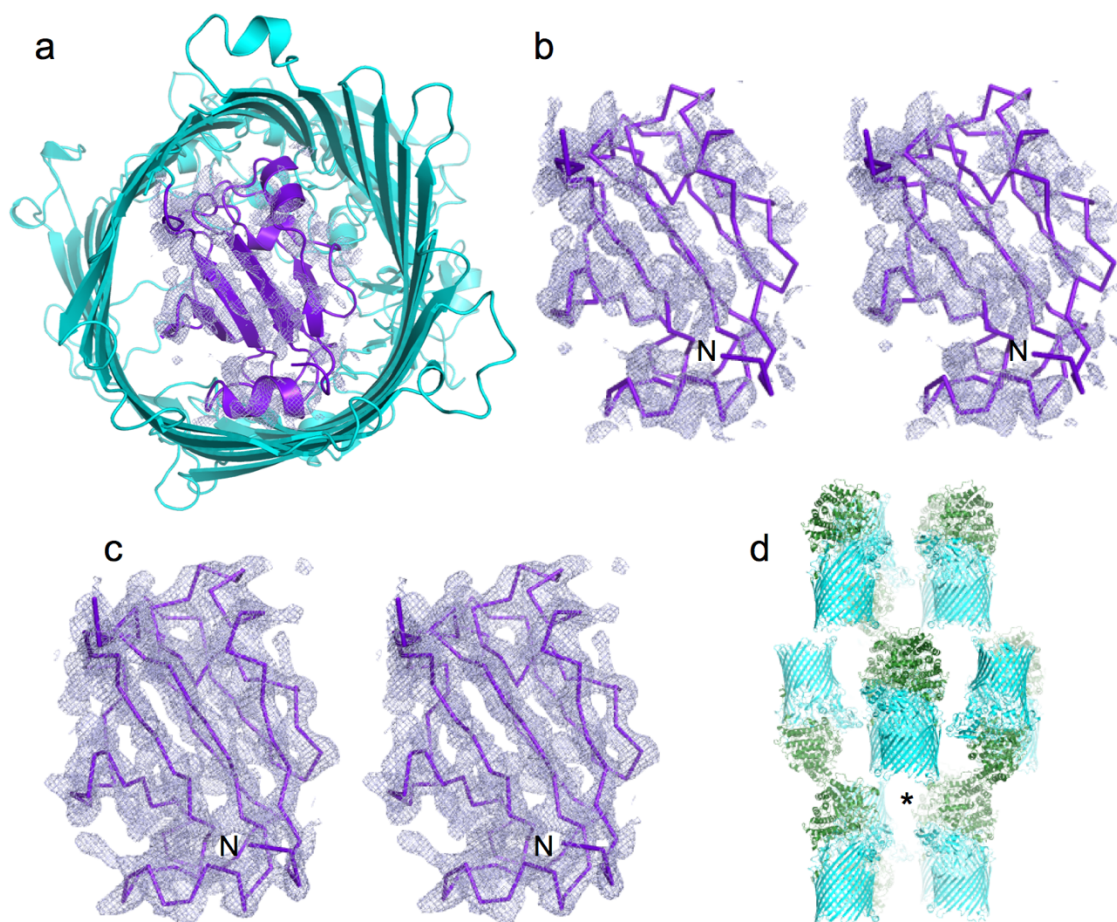

**Supplementary Figure 2** Crystal structure of apo Bt1762-63 showing poor density for the plug. **a**, Cartoon viewed from the periplasmic space, with the plug domain of the substrate-bound state superposed and coloured purple, showing poor 2Fo-Fc density for the plug ( $\sigma = 0.8$ , carve = 2). **b**, Stereo view of plug density of apo Bt1762-63 with the  $C\alpha$  ribbon superimposed in the same orientation as (a). The N-terminus is labelled (N). **c**, Stereo  $C\alpha$  ribbon with plug density for substrate-bound Bt1762-63 ( $\sigma = 1.5$ , carve = 2). **d**, Crystal packing of apo Bt1762-63. The large space within the crystal that could contain an ejected plug domain is indicated with an asterisk.

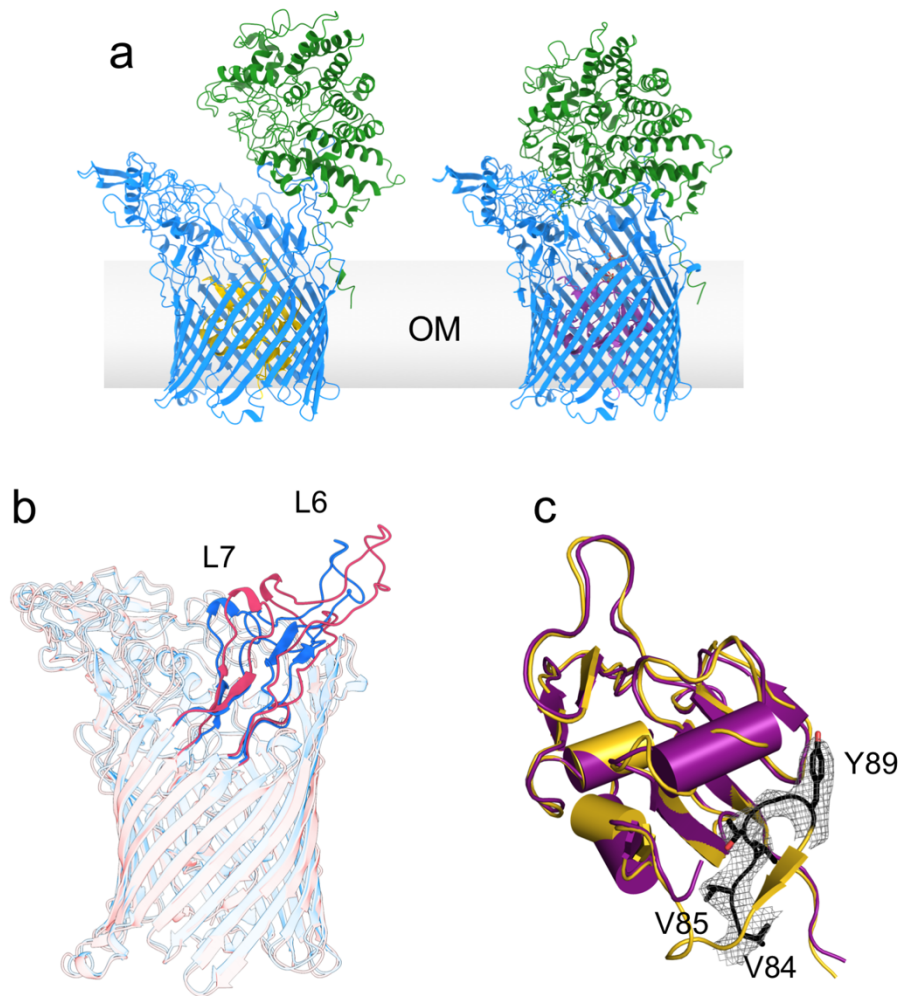

**Supplementary Figure 3** Differences between the open and closed structures of Bt1762-63. **a**, Cartoon models of the individual open (left) and substrate-bound, closed (right) transporter structures derived by cryo-EM and X-ray crystallography, respectively. For clarity, transporters are shown as monomers. **b**, Superposition of open (red) and closed states (blue) of Bt1763, with both hinge loops L6 (Hinge 2) and L7 (Hinge 1) highlighted. **c**, Overlay of plug domains from open (gold) and closed (purple), substrate-bound forms of the transporter. The Ton box (<sup>82</sup>DEVVVTG<sup>88</sup>) is visible only in the open state and is colored black, with sidechains displayed as sticks. The equivalent region in the closed structure is not visible and is therefore assumed to be disordered and likely protrudes from the barrel, leaving the Ton box accessible to TonB. The visible density for the N-terminus starts at residue 96 of the "closed" plug and at residue 84 for the "open" plug.

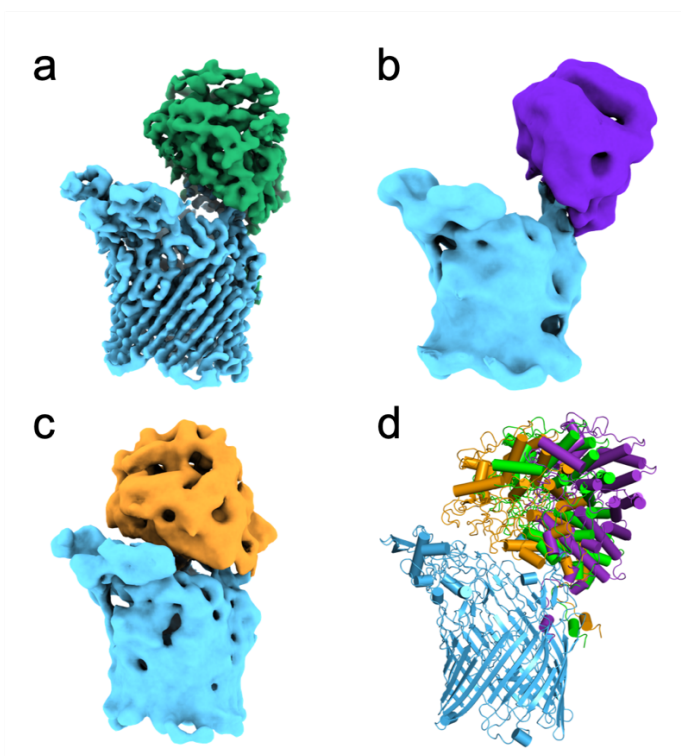

**Supplementary Figure 4** Variability in the position of Bt1762 observed in the open states of the transporter visualised by cryo-EM. **a**, Predominant open position observed in both the principle open-open and open-closed states. Less populated classes with wide open (**b**) and barely open (**c**) lid positions were also observed. **d**, Overlaid rigid-body fits of Bt1762 into the maps shown in **a-c**. EM density is filtered by local resolution and monomers are shown for clarity. The number of particles assigned to wide-open and barely-open states are 9,903 and 12,637 respectively.

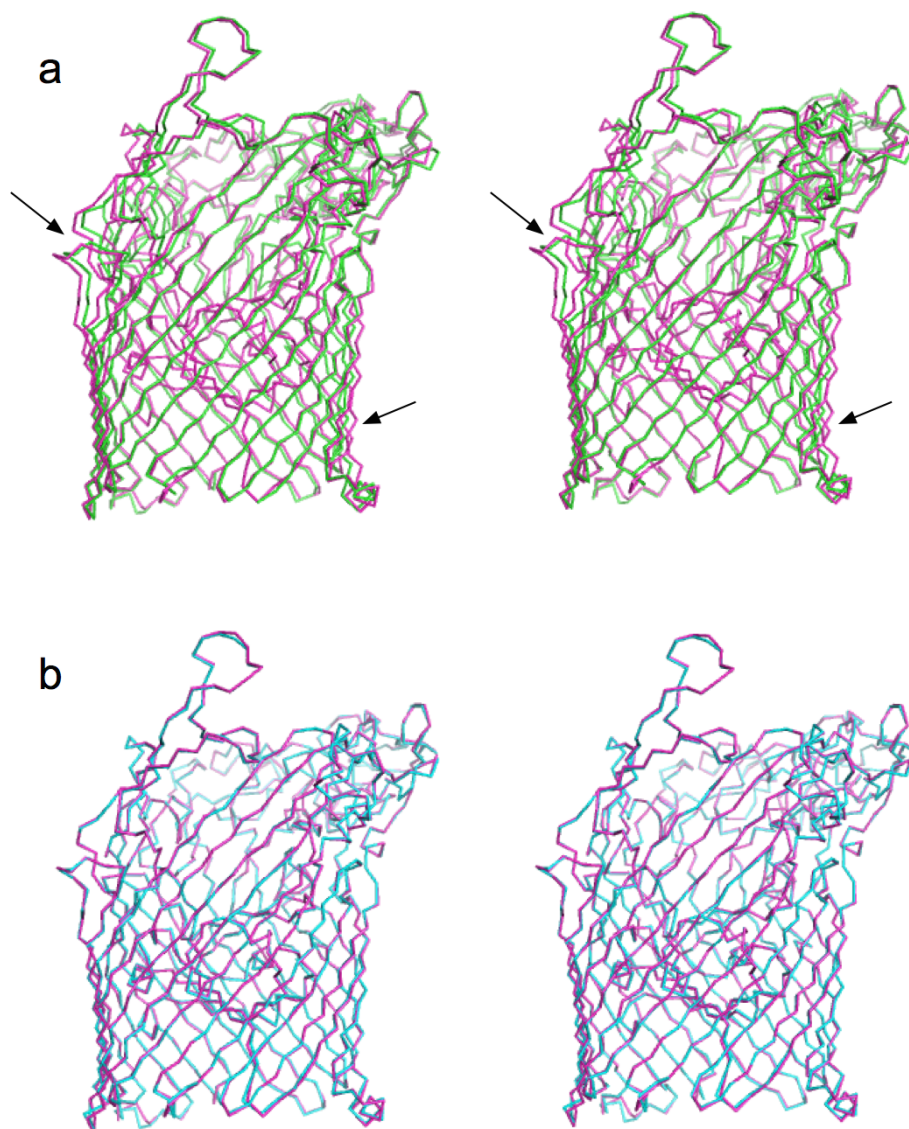

**Supplementary Figure 5** Differences in barrel shape for apo- and substrate-bound Bt1763. **a,b** Stereo ribbon superpositions for apo-Bt1763 (green; PDB 6Z8I) and substrate-bound Bt1763 (magenta; PDB 6ZAZ) (**a**) and for both substrate-bound Bt1763 structures (PDB ID 6Z9A and 6ZAZ) (**b**). Superpositions were generated in COOT via secondary structure matching for Bt1763. The arrows highlight some of the differences within the barrels. Both structures of substrate-bound Bt1763 are identical (**b**).

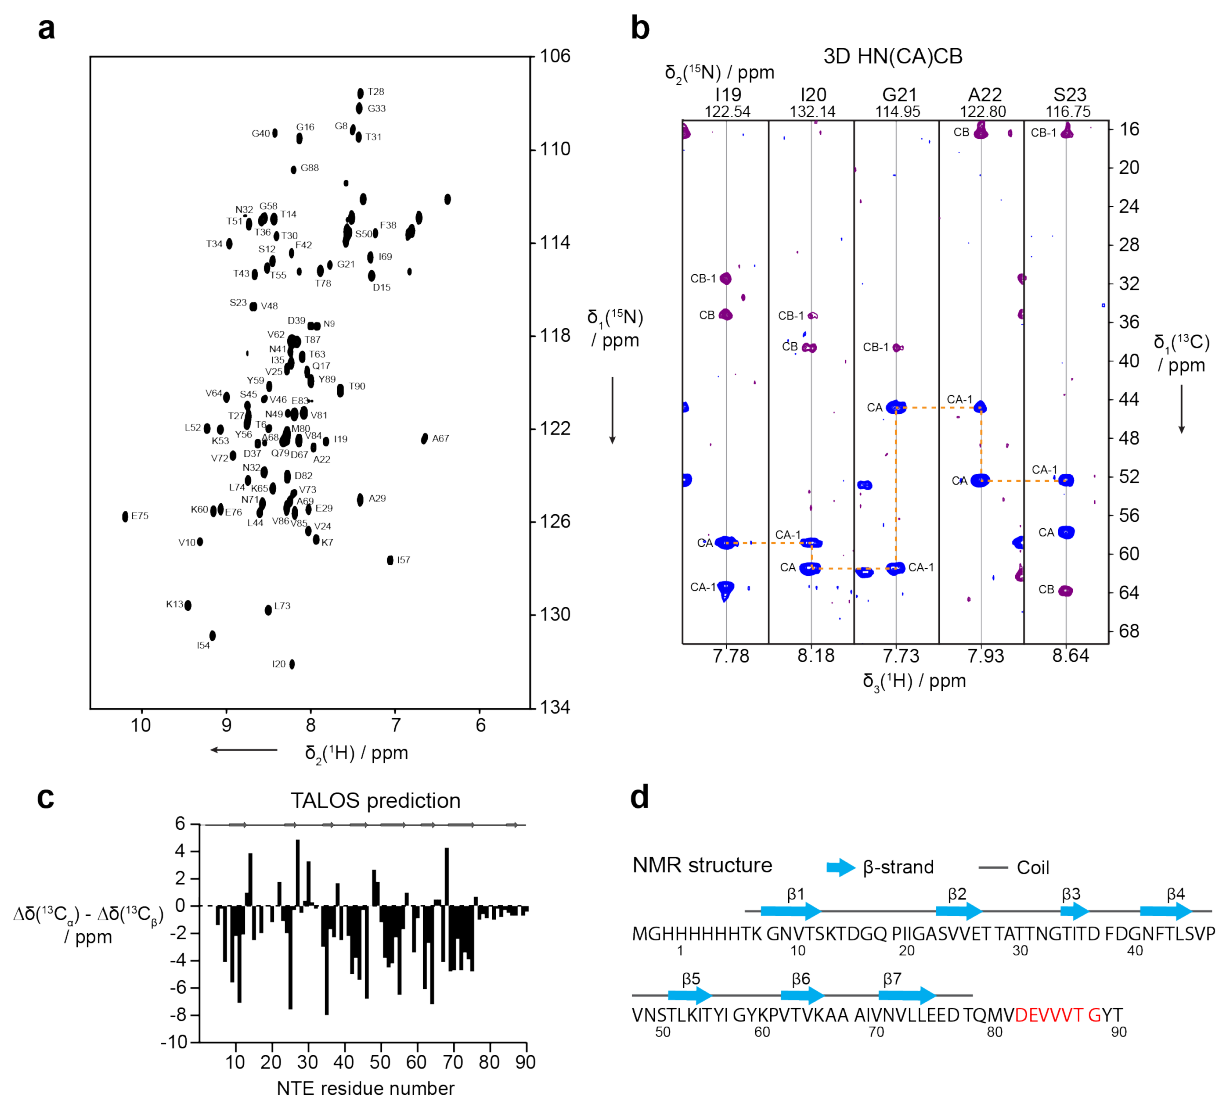

**Supplementary Figure 6** NMR backbone assignment and secondary structure of the Bt1763 NTE domain. **a**, 2D [ $^{15}\text{N}$ ,  $^1\text{H}$ ]-HSQC spectrum of NTE at 20 °C and pH 7.5. Sequence-specific resonance assignments are indicated. **b**, Example of backbone strips taken from the 3D HN(CA)CB experiments for residues I19–S23. Positive and negative intensity is shown in blue and purple, respectively. The  $\text{C}_\alpha$  backbone walk is indicated by an orange dashed line. **c**, Secondary chemical shifts relative to random coil values. Consecutive stretches of negative values indicate  $\beta$ -sheet secondary structure. The result of a TALOS secondary structure prediction using the chemical shifts from backbone resonance assignment is plotted on top. **d**, Sequence of the recombinant form of the NTE domain including the N-terminal His<sub>6</sub>-tag.  $\beta$ -sheet secondary structure distributions over the NTE amino acid sequence as determined by solution NMR spectroscopy are indicated. The Ton box is shown in red.

```

# Job:
# Query: s001A
# No: Chain Z rmsd lali nres %id PDB Description
1: 5aq0-B 10.2 1.5 70 82 23 MOLECULE: CARBOXYPEPTIDASE D;
2: 1uwv-A 7.9 1.7 67 393 22 MOLECULE: CARBOXYPEPTIDASE M;
3: 5hbb-C 7.9 3.9 76 267 13 MOLECULE: CELL SURFACE PROTEIN SPAA;
4: 4uzg-A 7.8 2.5 72 277 18 MOLECULE: SURFACE PROTEIN SPB1;
5: 5k39-B 7.8 5.7 76 153 24 MOLECULE: CELLULOSOME ANCHORING PROTEIN COHESIN REGION;
6: 3e8v-A 7.7 2.1 70 82 21 MOLECULE: POSSIBLE TRANSGLUTAMINASE-FAMILY PROTEIN;
7: 6fwv-A 7.6 7.8 82 522 17 MOLECULE: COLLAGEN ADHESION PROTEIN;
8: 4oq1-A 7.3 2.7 71 331 14 MOLECULE: CELL WALL SURFACE ANCHOR FAMILY PROTEIN;
9: 3kpt-B 7.1 3.4 74 355 15 MOLECULE: COLLAGEN ADHESION PROTEIN;
10: 4p0d-A 6.7 2.6 72 470 14 MOLECULE: TRYPSIN-RESISTANT SURFACE T6 PROTEIN;
11: 1r6v-A 6.6 9.4 81 671 12 MOLECULE: SUBTILISIN-LIKE SERINE PROTEASE;
12: 5n2j-B 6.5 2.3 73 1381 12 MOLECULE: UDP-GLUCOSE-GLYCOPROTEIN GLUCOSYLTRANSFERASE-LIKE
13: 4fl4-I 6.3 2.3 73 309 19 MOLECULE: GLYCOSIDE HYDROLASE FAMILY 9;
14: 4jdz-B 6.2 5.2 77 445 14 MOLECULE: SER-ASP RICH FIBRINOGEN/BONE SIALOPROTEIN-BINDING
15: 1eo2-B 6.2 5.2 73 238 15 MOLECULE: PROTOCATECHUATE 3,4-DIOXYGENASE ALPHA CHAIN;
16: 6fb3-A 6.2 6.9 75 1836 24 MOLECULE: TENEURIN-2;
17: 4eiu-A 6.2 3.3 77 242 17 MOLECULE: UNCHARACTERIZED HYPOTHETICAL PROTEIN;
18: 2y1v-A 6.1 3.5 73 604 18 MOLECULE: CELL WALL SURFACE ANCHOR FAMILY PROTEIN;
19: 5z0z-B 6.1 2.8 73 450 16 MOLECULE: PILUS ASSEMBLY PROTEIN;
20: 3uaf-A 6.0 4.0 70 117 20 MOLECULE: TTR-52;
21: 3pf2-A 5.8 2.7 71 317 18 MOLECULE: CELL WALL SURFACE ANCHOR FAMILY PROTEIN;
22: 2ww8-A 5.6 6.8 81 815 17 MOLECULE: CELL WALL SURFACE ANCHOR FAMILY PROTEIN;
23: 5z5m-A 5.6 2.6 69 273 12 MOLECULE: PREDICTED PROTEIN;
24: 5vxt-B 5.6 2.2 70 312 24 MOLECULE: CATECHOL 1,2-DIOXYGENASE;
25: 4iyk-A 5.6 5.9 76 210 8 MOLECULE: UNCHARACTERIZED PROTEIN;
26: 4z8w-A 5.5 3.0 70 125 23 MOLECULE: MAJOR POLLEN ALLERGEN PLA L 1;
27: 6ts2-D 5.5 2.2 68 1123 13 MOLECULE: UDP-GLUCOSE-GLYCOPROTEIN GLUCOSYLTRANSFERASE-LIKE
28: 6jch-A 5.2 2.5 70 327 17 MOLECULE: PILUS ASSEMBLY PROTEIN;
29: 5xyr-A 5.2 2.4 62 1380 8 MOLECULE: CHEMOKINE PROTEASE C;
30: 2x5p-A 5.2 2.4 67 104 16 MOLECULE: FIBRONECTIN BINDING PROTEIN;

```

**Supplementary Figure 7** DALI analysis of the NTE. The thirty best hits are shown.

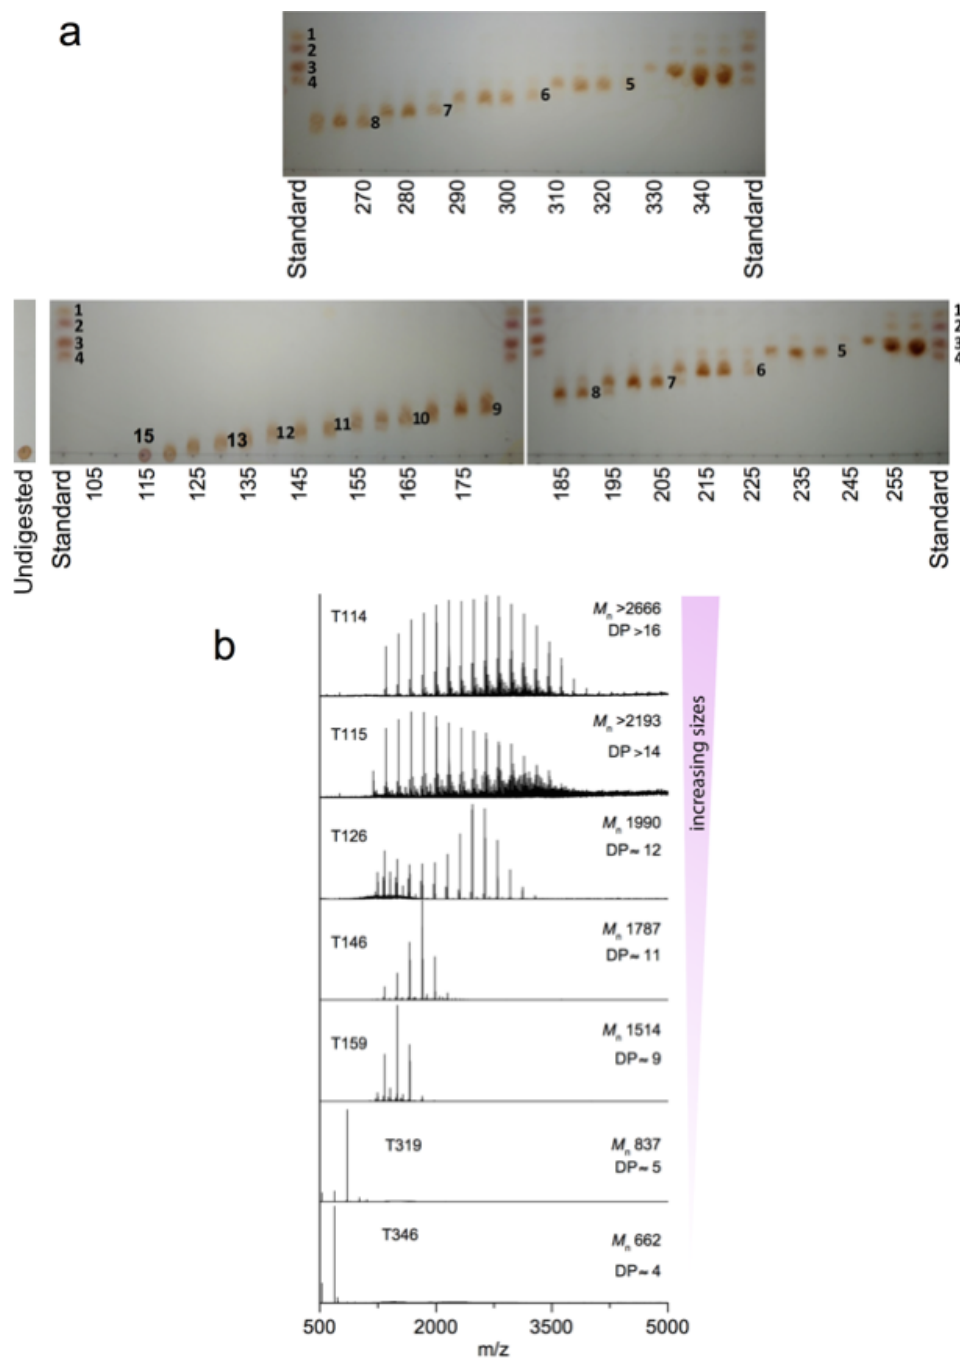

**Supplementary Figure 8** Characterisation of  $\beta$ 2,6 fructo-oligosaccharide (FOS) fractions. **a**, TLC analysis of digested *Erwinia* levan fractions from two different runs (top and bottom) after separation on a P2 SEC column. Approximate DP of FOS in each fraction are indicated. A sample of undigested levan is shown on the left. The standard consisted of  $\beta$ 2,1 FOS1-4 (Fructose, sucrose, kestotriose, kestotetraose; Megazyme). **b**, Representative mass spectra of *Erwinia* FOS fractions from (a). The average molar mass is shown ( $M_n$ ), based on the intensity-weighted signal intensities in the spectra. Source data are provided as a Source Data file.

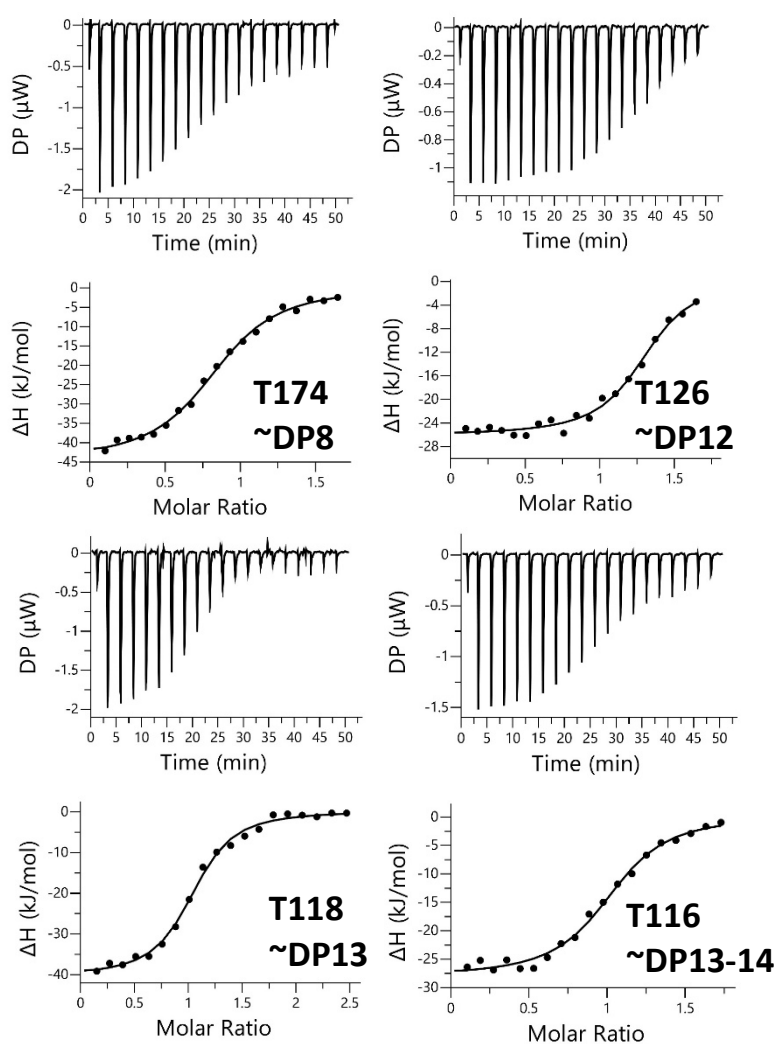

**Supplementary Figure 9** ITC traces showing FOS binding to Bt1762-63 SusCD.  $\beta$ 2,6 FOS fractions from SEC of partially digested *Erwinia* levan were titrated into purified Bt1762-63 SusCD complex (25  $\mu$ M) in 100 mM Hepes, pH 7.5 containing 0.05% LDAO. The identity of the fraction used is indicated (T), as is the approximate DP of the main FOS species present in each fraction as determined by MS (Supplementary Fig. 8). The upper parts of each titration show the raw heats of injection and the lower parts the integrated heats, fit to a one set of sites model.

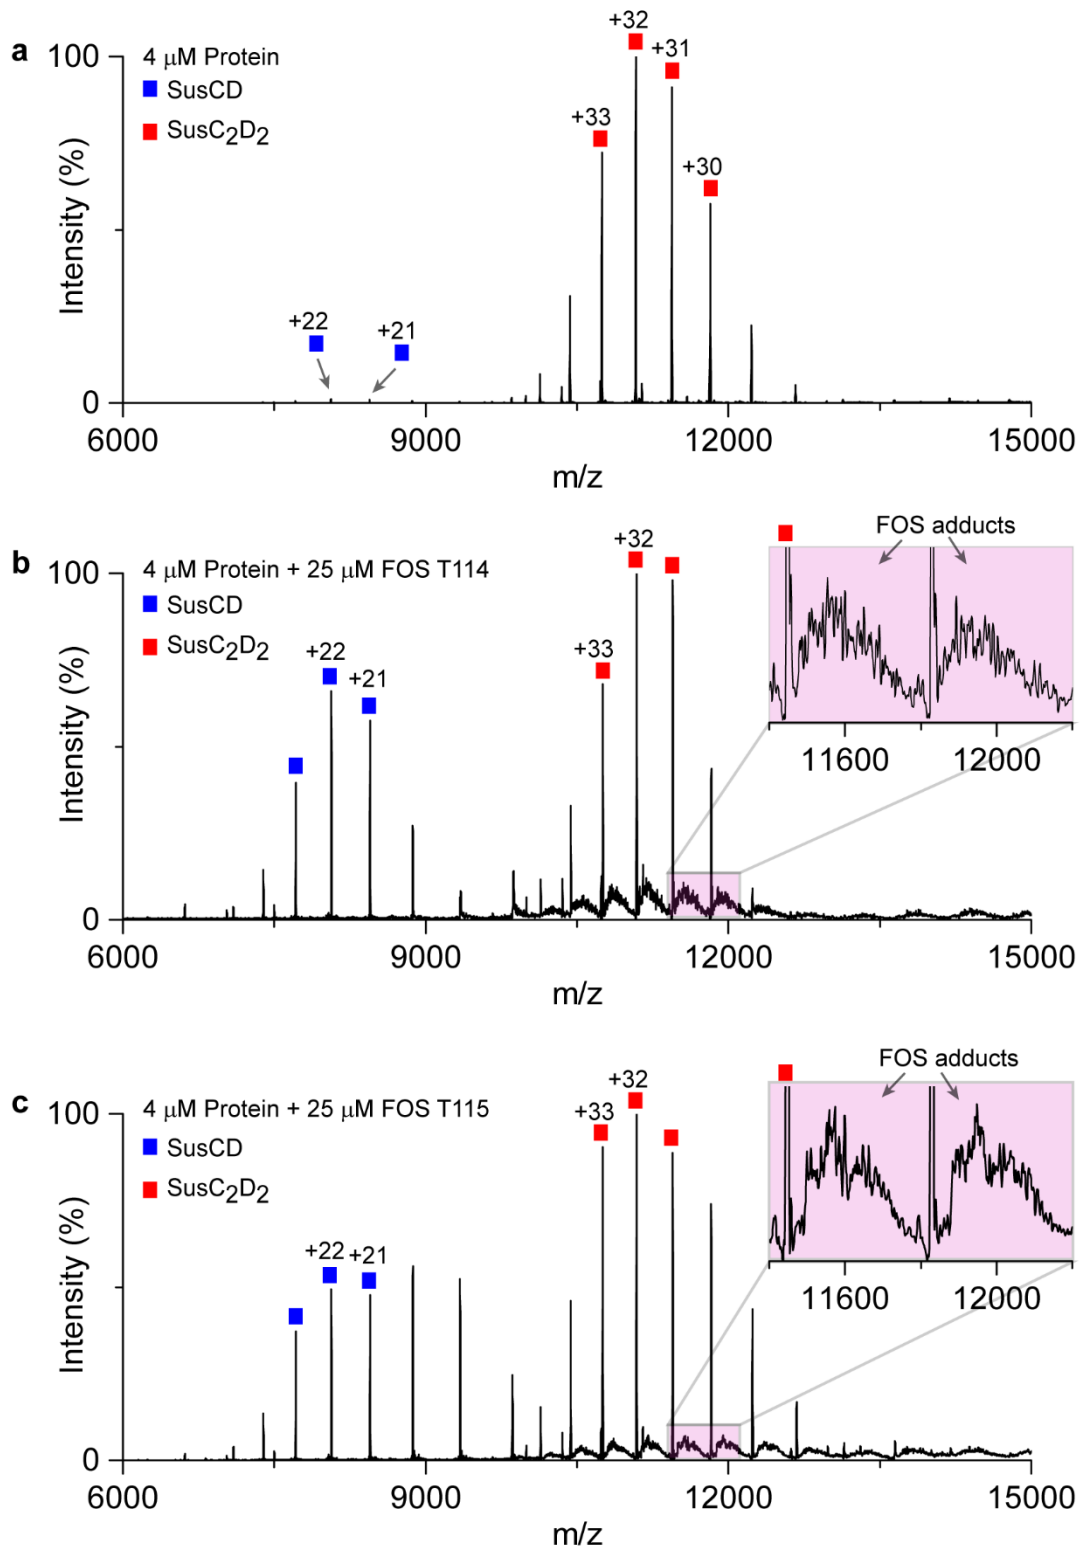

**Supplementary Figure 10** Native mass spectra of Bt1762-63 without **(a)** and with long-chain FOS **(b; T114, c; T115)**. Inserts, zoomed-in view of peaks corresponding to bound FOS molecules.

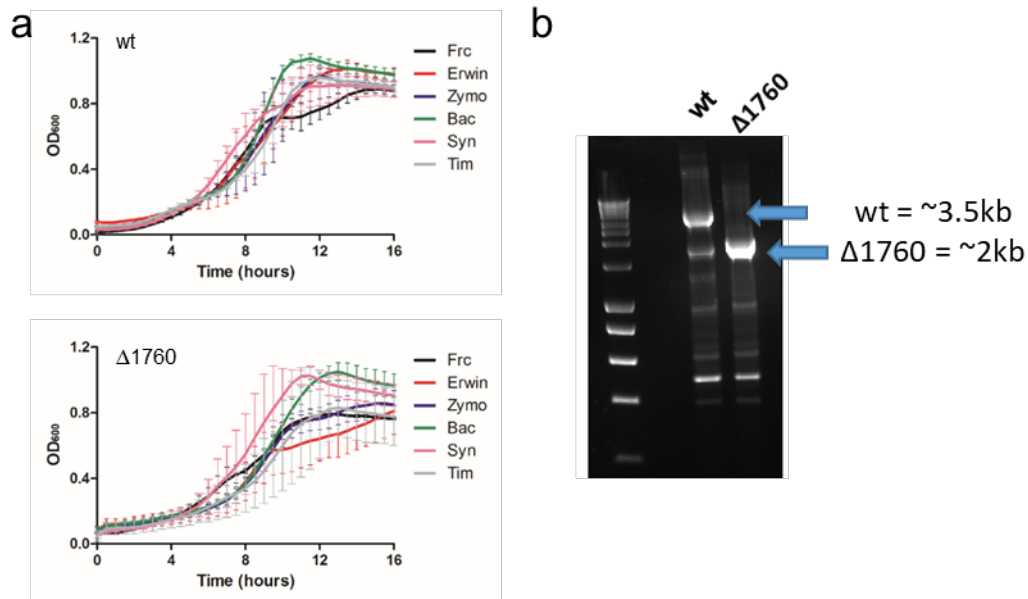

**Supplementary Figure 11** Growth of *B. theta* wild-type and  $\Delta 1760$  strains on different levans. **a**, *B. theta* wild type (wt) and  $\Delta 1760$  deletion ( $\Delta 1760$ ) strains were grown in minimal media with a range of levans as the sole carbon source. Levans used; Erwin = *Erwinia herbicola*, Zymo = *Zymomonas mobilis*, Bac = *Bacillus* sp., Syn = *in vitro* synthesised using levansucrase, Tim = Timothy grass. Frc = fructose. Growth curves show mean (solid line) +/- SD of triplicate wells and are representative of 3 independent experiments. **b**, PCR analysis of genomic DNA isolated from stationary phase cells of the *Erwinia* levan cultures. Primers flanking the *Bt1760* gene were used for amplification. This experiment was carried out once. Source data are provided as a Source Data file.

|              |        |                                    |                                        |                               |                                |     |
|--------------|--------|------------------------------------|----------------------------------------|-------------------------------|--------------------------------|-----|
| BT1763       | LWQQNI | <b>TVKGNVT--SKTDGQPIIGASVVETTA</b> | ----                                   | <b>TTNGTITDFDGNFTLSVPVN-S</b> | 75                             |     |
| BT2264       |        |                                    |                                        |                               | 0                              |     |
| PG0185       | RagA   | AMAQNR                             | <b>TVKGTVI--SSEDNEPLIGANVVVVG</b>      | ----                          | <b>TTIGAATDLDGNFTLSVPANAK</b>  | 70  |
| BT0268       |        |                                    |                                        |                               | 17                             |     |
| BT0272       |        | VRAQDI                             | <b>PVSGVVK--DKSNSTLPYASVIVKNESGKTV</b> | QQLSTTTDDNGRFSTKVKSG-Y        | 77                             |     |
| BT0362       |        | WAQDAK                             | <b>VLKGRV--VNAEGEPIAGAVNVAEA</b>       | ----                          | <b>SR-IALSDDKGGFTLNKVPKPAD</b> | 82  |
| BT3090       |        | AFAQQI                             | <b>TVKGVH--VDATGEPVIGASVIEGK</b>       | ----                          | <b>STNGTITDIDGNFSLNVSAN-S</b>  | 76  |
| BT3332       |        | FVLAQV                             | <b>LVKGTV--KDNLGEVPGASVQVKG</b>        | ----                          | <b>TSQGTITDLDGKFTLNIPQKNA</b>  | 64  |
| BT3680       |        | FAQGGI                             | <b>DVAGIV--LDEQQQELIGVSVQIKGK</b>      | ----                          | <b>QGVGVVTFDGRFKITGVPAGS</b>   | 69  |
| BT3702       |        | AFAQQI                             | <b>TVKGVH--KDTTGEPIIGANVVVVG</b>       | ----                          | <b>TTTGTITDFDGNFQLSAKQ-D</b>   | 73  |
| BT3983       |        | STQQQQ                             | <b>KVTGKV--VDANNEPLIGVSVLEKG</b>       | ----                          | <b>TTNGTITDFDGNFTLVVVTGSNA</b> | 171 |
| BT4114       |        | VSAQTI                             | <b>TILNGNV--KDTTGEPIIGASIVEKGN</b>     | ----                          | <b>TTNGTITDLDGNFSLKVPAN-A</b>  | 73  |
| BT4121       |        | ANAQTR                             | <b>KVTGQI--VDESGQPIIGATIRLQD</b>       | ----                          | <b>ATTGTITDIDGHFSLNVPDG-K</b>  | 81  |
| BT4164       |        | AGQQQV                             | <b>KVIGIV--KDTTGEPIIGANVVVVG</b>       | ----                          | <b>TTTGTITDFDGNFQLSAKQ-D</b>   | 80  |
| BT4168       |        | WGQQGQ                             | <b>KLTGKI--LSATNQVEGAIVTVLDT</b>       | ----                          | <b>MNVTTNKEGAFQFEVKDLSK</b>    | 71  |
| BT4660       |        | LHAQNA                             | <b>TVKGVH--VDETDTPLIGATVQVKG</b>       | ----                          | <b>TATGSIITDFDGNFTIKANKG-A</b> | 76  |
| BT4671       |        | AQQGGK                             | <b>KMTGQV--IDENKEPMIGVSVILIVG</b>      | ----                          | <b>TSTGTVTFDGNFTLVNVPKDSK</b>  | 80  |
| BACOVA_02096 |        | IQQQSV                             | <b>KIKGRV--TDASGEPVIGANVVQKG</b>       | ----                          | <b>TTNGTITDLNGDFTLTVSQG-A</b>  | 86  |
| BACOVA_02652 |        | APSQNL                             | <b>KVSGIVT--SATDGEPLIGVSVQVKG</b>      | ----                          | <b>TSTGTITDLNGKYTLNVSTG-Q</b>  | 83  |
| BACOVA_02742 |        | IQQQSN                             | <b>KVTGKV--SD-ATGPIIGASVVEKG</b>       | ----                          | <b>TANGTITDLDGNFSLNPKAG-A</b>  | 85  |
| BACOVA_03426 |        | SAQKGI                             | <b>TVRGTV--LDSNGETIIGASVTLKGN</b>      | ----                          | <b>NSVGTISDIDGNFVLTVPSEKS</b>  | 79  |
| BACOVA_03428 |        |                                    |                                        |                               | 0                              |     |
| BACOVA_04393 |        | --AQTV                             | <b>SVTGVV--KDASGEPIIGASVVEAG</b>       | ----                          | <b>TTNGIVTDLDGNFKLNVSAN-G</b>  | 73  |
| BACOVA_04505 |        | LWQQNI                             | <b>TVKGNVT--SKTDGQPIIGASVVQND</b>      | ----                          | <b>KSTGTITDLDGNFTLSVPTN-A</b>  | 75  |

|              |      |                                                  |                 |                        |      |     |
|--------------|------|--------------------------------------------------|-----------------|------------------------|------|-----|
| BT1763       |      | <b>--TLKITYIGYKPVTVKA--AA--IVNVLL-EEDTQM</b>     | <b>DEVVVV</b>   | <b>TYTQR-KA</b>        | ---- | 120 |
| BT2264       |      |                                                  |                 |                        |      | 38  |
| PG0185       | RagA | <b>--MLRVSYSGMTKEVAI--AN--VMKIVL-DPDSKVL</b>     | <b>EQVVVLG</b>  | <b>YGTGQKLS</b>        | ---- | 116 |
| BT0268       |      | <b>--LAVVGFGLFSGAIASQSSSPANIDSVKTYM--KNS</b>     | <b>FKNVGR</b>   | <b>FVTNR-SI</b>        | ---- | 66  |
| BT0272       |      | <b>--RLVFSFLAFDLSLKVTKPSE--RMQIYL-SPTENML</b>    | <b>DETVVVG</b>  | <b>FKRVS-KA</b>        | ---- | 125 |
| BT0362       |      | <b>--ELYVSSVGYLPATAIADF-DE--NFKIVM-DADLDEY</b>   | <b>AHTTLP</b>   | <b>FNRPK-KK</b>        | ---- | 129 |
| BT3090       |      | <b>--ALTIISFVGKTKTQTVSV-NGKT--ALKVTL-QEDTEVL</b> | <b>DEVVVVG</b>  | <b>YGTMK-KS</b>        | ---- | 123 |
| BT3332       |      | <b>--TLVISFIGYVTVQKA-DSQK--PMVITL-KEDTKT</b>     | <b>DEVVVVG</b>  | <b>YQEVRR-RR</b>       | ---- | 111 |
| BT3680       |      | <b>--TLVFSYIGYETREIKYTATKL--KEKIAL-KEAVNE</b>    | <b>DEVVVVG</b>  | <b>RDTQR-KV</b>        | ---- | 117 |
| BT3702       |      | <b>--IIVVFSYIGYQPELQV-AA--QMNVIL-KDDTEIL</b>     | <b>DEVVVVG</b>  | <b>YGQVK-KN</b>        | ---- | 118 |
| BT3983       |      | <b>--VLQFSYVGYQTLERAV-AGKT--AINITL-KEDAQVL</b>   | <b>DEVVVV</b>   | <b>ALGIKRSEK</b>       | ---- | 219 |
| BT4114       |      | <b>--TVVISYIGMKTQEIAT-KGKS--KIDVTL-SDDAKAL</b>   | <b>DEVVVVG</b>  | <b>YGTAK-RK</b>        | ---- | 120 |
| BT4121       |      | <b>--KVVISYIGYKQVILP-K-GD--TLKVIL-QEDNQKL</b>    | <b>DEVVVVG</b>  | <b>YGSMK-QK</b>        | ---- | 127 |
| BT4164       |      | <b>DLTIVYSYIGMKTTRIKY-TGQT--LLNVTL-ESESMA</b>    | <b>DEVVVV</b>   | <b>SARRLNRLDGLISDK</b> | ---- | 135 |
| BT4168       |      | <b>AGEISVWAPGYFSVKQLIRE-RS--NIVITLIPENQYK</b>    | <b>NETMILP</b>  | <b>FRREG-EMQLE</b>     | ---- | 124 |
| BT4660       |      | <b>--VITFSYIGYKQEIAT-TGQS--PLNVKM-IPDNQT</b>     | <b>DEVVVVG</b>  | <b>YGTMK-RS</b>        | ---- | 123 |
| BT4671       |      | <b>--ELQFSYVGYETKVTIPVNSN--VLNVQM-KSDSQVL</b>    | <b>SDVVIIG</b>  | <b>YGTQR-KS</b>        | ---- | 128 |
| BACOVA_02096 |      | <b>--VLQFSYIGYKQEVSLKNGQA--QVTVVL-KDDAEL</b>     | <b>DEVVVVG</b>  | <b>YGTMK-KR</b>        | ---- | 134 |
| BACOVA_02652 |      | <b>--TLVFSYIGYKQEVV-V-ATKP--VINVTL-KEDTKT</b>    | <b>DEVVVVG</b>  | <b>YGTMK-RS</b>        | ---- | 129 |
| BACOVA_02742 |      | <b>--TLVVSYVGYKSEE-VK-AGRG--PLNITL-KEDAKAL</b>   | <b>DEVVVV</b>   | <b>ALGIKRERK</b>       | ---- | 132 |
| BACOVA_03426 |      | <b>--VLIVSYVGMKPQEVKVSSEKGM--IKVTL-EDDTKQ</b>    | <b>LEVVVVG</b>  | <b>YGQK-KA</b>         | ---- | 126 |
| BACOVA_03428 |      | <b>--MNRKFIYIGCTVFAMSL--LSMTGVQAQEE</b>          | <b>KDSLNVVA</b> | <b>FGKVA-QE</b>        | ---- | 44  |
| BACOVA_04393 |      | <b>--SLKISFIGYQTQTIIPV-AGKK--QFDITL-KEDAKVL</b>  | <b>DEVVVVG</b>  | <b>YGQMK-RS</b>        | ---- | 120 |
| BACOVA_04505 |      | <b>--LLAISYIGYKEVIAA--KP--SLKIVM-EEDAKMI</b>     | <b>DEVVVVG</b>  | <b>YMAEK-KA</b>        | ---- | 120 |

|        |      |                                                               |      |           |     |
|--------|------|---------------------------------------------------------------|------|-----------|-----|
| BT1763 |      | <b>DLTGAVSVVVKV-DEIQK-QGENNPVKALQGRVPGMNITADGNPSGS-ATV-R</b>  | ---- | <b>IR</b> | 170 |
| BT2264 |      | <b>ALGYAATSVGG-EKIAE-SRTSDVMSSLAGKTAGVQISSTSSDPGASNSV-I</b>   | ---- | <b>IR</b> | 89  |
| PG0185 | RagA | <b>TVSGSVAKVSS-EKLAE-KPVANIMDALQGGVAGMQVMTTSGDPTAVASV-E</b>   | ---- | <b>IH</b> | 167 |
| BT0268 |      | <b>DSFGVSDTVDI-EMLQR-SQFLSIQQLLKGNVPGVYQENNGEPTIQSM-L</b>     | ---- | <b>VR</b> | 117 |
| BT0272 |      | <b>AVTASVTVIKA-EDLVN-TPVANPMEQLQGRVPGNLNQMNGTTPGGLPFSF-S</b>  | ---- | <b>IR</b> | 176 |
| BT0362 |      | <b>FVTESTSIVTG-EELEK-HPVTVLQNAFTSTVTGVEYEAQSEPGWSETAMY</b>    | ---- | <b>IR</b> | 181 |
| BT3090 |      | <b>DLTGAVSSVGV-KDIKD-SPVANIGQAMQGVSGVQII-DAGKPGDNVTI-K</b>    | ---- | <b>IR</b> | 173 |
| BT3332 |      | <b>DLTGSAKANM-ADVLT-APVASFDQALGGRIAGVNVTSSEGMPGGNMSI-V</b>    | ---- | <b>IR</b> | 162 |
| BT3680 |      | <b>SVVGAITNVDP-AGIQA--PAVSVSNMLGGRVPGIIAVTRSRGSEPGNNFSEFW</b> | ---- | <b>IR</b> | 168 |
| BT3702 |      | <b>DMTGSVMAIKP-DELSK-GITNAQDMLSGKIAGVSVISNDGTPGGGAQI-R</b>    | ---- | <b>IR</b> | 169 |
| BT3983 |      | <b>ALSYNVQQVNA-DAVTT-NKDPNFINSLSGKVAGVNIASSSGVGGVSKV-V</b>    | ---- | <b>MR</b> | 270 |
| BT4114 |      | <b>DITGSVATVNA-EALTV-VPVASATEALTGKMAGVQITTEGSPDAEMKI-R</b>    | ---- | <b>VR</b> | 171 |

|              |                                                               |     |
|--------------|---------------------------------------------------------------|-----|
| BT4121       | NITGSVSTISA-EELED-LPVSNLSEALQGMVNLVQLGSSRPGTNANEVYIRQNRTFT    | 185 |
| BT4164       | EMVSATQKVDMEKLI AA-APVVSIEEALQGGQLGGVDIVL-GGDPGSRSAI-R-----IR | 186 |
| BT4168       | DYTAAT- NIAK-KDFMP--GTTKIDRALTGQVAGLQVQRSSGMPGEGSY-N-----LR   | 173 |
| BT4660       | DLTGSVASIAA-KDVEG-FKTSVAVAGALGGQIAGVQITSTDTGTPGAGFSI-N-----IR | 174 |
| BT4671       | DLTGSVASVGT-KDFNK-GMVSSPEELVNGKIAGVQIVNNGGSPTSVSTI-R-----IR   | 179 |
| BACOVA_02096 | DLSGAVSQIKS-DDLMK-GNPTDLKSLAGKIAGVQVNSDQAPGGGISI-Q-----IR     | 185 |
| BACOVA_02652 | DLTGSVSVTG-DELKK-SVVTSLDQALQGRAAGVSVTQNSGAPGGGIVS-S-----IR    | 180 |
| BACOVA_02742 | ALGYGIDEVKG-EALTK-AKETNLINSMAGRVPGLVVSQTAGGPGSSTRV-I-----LR   | 183 |
| BACOVA_03426 | SVVGAITQTSG-KTLERAGGVTSLSALTGSLPGVITSASSGMPGAEDPQII-----IR    | 179 |
| BACOVA_03428 | DLTHAISTVNT-SELTKKTANN-----SLVGLSEFV-----G-----G-----YN       | 79  |
| BACOVA_04393 | DLTGSVSVND-EAIKK-SVVTSDVQLQGRAAGVQVQANSMPGGSSSI-R-----IR      | 171 |
| BACOVA_04505 | SLTGSVAVVKM-KEVAD-IP TGNVMSGLQGRVAGMNVTTDGKPGGNTDT-K-----LR   | 171 |

|              |                                                                        |     |
|--------------|------------------------------------------------------------------------|-----|
| BT1763       | <b>GIGTLN-----N--NDPLYIIDGVPTKA-----GMHE-L</b>                         | 196 |
| BT2264       | <b>GVSSLS-----GT-NQPLYVVDGVP LN NSTVYSTDGL----NSGYDFGNGANAI</b>        | 133 |
| PG0185 RagA  | <b>GTGSLG-----AS-SAPLYIVDGMQTSL-----DVVATM</b>                         | 195 |
| BT0268       | GLSSPVFSNK-----DVSS-VQPTVYLVNGVPLML <b>LENSYVYDIKQFDINPIGAANMLAGL</b>  | 171 |
| BT0272       | GVSDISVQSSGDGEFMMGL-TPPPLFVVDGIPQ <b>EDVTGYDAAG-----LLSGATVSP</b> LAMI | 230 |
| BT0362       | GIRTMN-----ASARSPLIIVDNVERD-----LSFL                                   | 207 |
| BT3090       | GLGTIN-----N--SNPLVVIDGIP T-----DLGLSSL                                | 199 |
| BT3332       | GNNSLT-----QE-NSPLFVIDGFP <b>IED-----SSA</b> ASTL                      | 191 |
| BT3680       | GMSTFG-----AS-SSALVLIDGIEGN-----INDL                                   | 193 |
| BT3702       | GGSSLN-----AS-NDPLIVIDGLAID <b>NEGI-----KGM</b> ANGLSMV                | 204 |
| BT3983       | GTKSIM-----QS-SNALYVVDGVP <b>MYSNANKVNGTE----FSSKGNTEP</b> IADI        | 314 |
| BT4114       | GGGSIT-----GD-NTPLFIVDGF <b>PVES-----ISDI</b>                          | 197 |
| BT4121       | GISKDG-----GN-STPLI IID <b>DTNG-----QPSMEQ</b> FNML                    | 220 |
| BT4164       | GTSTLN-----AS-SDPLIVIDGVP <b>YPTAISDDFNFS----TATEEDL</b> GALLNI        | 230 |
| BT4168       | GIRTLT-----GD-NAPLIVINGV <b>HPMDKTPSALI-----DG</b> FTRDIFQFY           | 214 |
| BT4660       | GVGTLT-----GD-SSPLYIVDGF <b>VEDD-----IDYL</b>                          | 200 |
| BT4671       | GGASLN-----AS-NDPLIVLDGVP <b>MEVGG-----ISGGGN</b> FLSLI                | 215 |
| BACOVA_02096 | GTNSFS-----TN-SQPLYIVDGV <b>PFDTGDTPASDT-----NNSQNK</b> SNPLAFI        | 228 |
| BACOVA_02652 | GINSLN-----G--NEPLYVIDGVA <b>ISGNTD-----GNSSV</b> LSSI                 | 213 |
| BACOVA_02742 | GSTEMT-----GN-NQPLYVVDGVP <b>LDNTNFGSAGTN----GGFDLGD</b> GISSI         | 226 |
| BACOVA_03426 | TQSSWN-----N--SEPLIIVLDG <b>IERE-----MSSV</b>                          | 203 |
| BACOVA_03428 | GSSSLWG-----QQPLVLVDGVP <b>RS-----ASSV</b>                             | 102 |
| BACOVA_04393 | GINSLN-----AS-NEPIFVIDG <b>VIDGSTG-----SGSDNA</b> LASI                 | 206 |
| BACOVA_04505 | GITTIN-----N--SSPLYVIDG <b>VQTHD-----NVASII</b>                        | 198 |

|              |                                                                          |     |
|--------------|--------------------------------------------------------------------------|-----|
| BT1763       | <b>NGNDIESIQVLKDAASAIYGSRAANGV I I I TTKQKKG</b> -QI-KINFDA SVSASMYQSKM  | 254 |
| BT2264       | <b>NPDDVANMTILKGAATAIYGSRAANGV V M I TTKSGRKE</b> -KGVGIEYNGGVQWSTVLR-L  | 191 |
| PG0185 RagA  | <b>NPDEFMSV LK DASATAIYGSRAANGV V I I TTKGKMS</b> -ERGRITFNASYGISQILN TK | 254 |
| BT0268       | DISSIESIEI IKDPLQLAKLGPLAANGAIWI TTKDGYGGE--NVSIGVSAGMAFAPSSV            | 229 |
| BT0272       | PLEDIANIQVLKDA AATS LYSGKAYGVIL IETKRGETA-KP-KVSYSANFVVKTPPRLR           | 288 |
| BT0362       | DAYPIESIT I LKDA AATAIYGMRGANGAVLV TTKRGETG-KT-KINF TQEVGFQTIAGIP        | 265 |
| BT3090       | NMADVERVDV LK DASATAIYGSRGANGV V M I TSKRGAEG-AG-KVTVNANWAIQNA TKVP      | 257 |
| BT3332       | NPSDIESLDFLKDASATAIY GARGANGV V I I TTKKGVG-RA-QLSYDGSFGVQHVRTI          | 249 |
| BT3680       | DPADIESF S I LK DASATAVY GTRGANGV V V TTKRKGAG-KL-HVNFKT NATYSYSPRMP     | 251 |
| BT3702       | NPADIE TLTV LK DASATAIYGSRASNGV I I I TTKKGNK-QAPSVSYNGSVSFSKTQKRY       | 263 |
| BT3983       | NPEDIESMSVLTGAAAALYGSDAANGAI I I TTKKKEG--RVNITVNSNVEFNAPLV-M            | 371 |
| BT4114       | PASDIEDMTVLK DASATAIYGSRGANGV I LV TTKSGKEG-KI-SVNYNAYYSWKMAKQL          | 255 |
| BT4121       | DPSEVESITVLRDAS-AAIYGSRAANGAILVKT KRGGK-VP-VISYSGKFAVNDVAVSHS            | 277 |
| BT4164       | SPNDIASVEVLK DASATAIWGTQ GANGLV I KTKQGTVG-KT-RF SFSKWTMKEDPSTI          | 288 |
| BT4168       | HLQDIQNITILKGAE-AA MYGSMG SNGVIL I ETDGTASNDLETRVSYGSGYGINW NDKRM        | 273 |
| BT4660       | SNSDIESIEVLK DASSAIY GARAANGV V LI TTKSGKTG-RP-TITYNGSAS YRKISKKL        | 258 |
| BT4671       | NPNDIESMTVLK DASATAIYGSRASNGV I I I TTKKSGS-DI-KVSFQTTNSIATKTKTS         | 273 |
| BACOVA_02096 | NPHDIQSIDVLK DASATAIYGSRGANGV V I I TTKRGEK-NE-KVEFSANFTFSKIAKRM         | 286 |
| BACOVA_02652 | NPSDIVSMEILK DASATAIYGSRASNGV V LI TTNQKAS-KT-KVSYEGYGLQQLPKKL           | 271 |
| BACOVA_02742 | NADDVENMSVLK GPAASALYGS RASHGV I L I TTKRANKD--KISVEYNGTLT FDTQLAKW      | 284 |
| BACOVA_03426 | DISSVENISVLK DASATAVYGVK GANGLV I L I TTKRGGK-KA-SVQIKANVTAKVASKLP       | 261 |
| BACOVA_03428 | KASEVESISMLK DAAAVLYGSRAAKGV I L I TTKRKGDS--PMHIDVRANVGVNVPKAYP         | 160 |
| BACOVA_04393 | NPSDIVSMDVLK DASATAIY GARAANGV I M I TTKRQKQ- EA-QITYDGYIGWQEMP KKL      | 264 |
| BACOVA_04505 | SSNDVESIQVLKDAASAAIYGAQAANGV I I I TTKRAKEG-DV-KVSFDMSLTAQTF TGGI        | 256 |

**Supplementary Figure 12** ClustalOmega alignment of SusC orthologs from *B. theta* and *B. ovatus* with known glycan specificities. The RagA protein from *P. gingivalis* (Pg0285)<sup>17</sup> and Bt2264 SusC, a putative peptide importer<sup>15</sup>, are shown as well. Only the first ~250 amino acids are shown for clarity, as SusCs are usually >1000 residues in length. The NTE is indicated in blue, with the secondary structure from NMR annotated. Residues corresponding to the Ton

box are shown in red, and those for the plug loop in green (dark green for long plug loops and light green for short plug loops). The plug is coloured purple. X-ray crystal structures have been solved for Bt1763 (no plug loop), Bt2264 (long plug loop; PDB ID 5FQ8) and RagA (no plug loop; PDB ID 6SLN). The alignment shows there are three classes of SusC orthologs, with absent, intermediate and long plug loops.

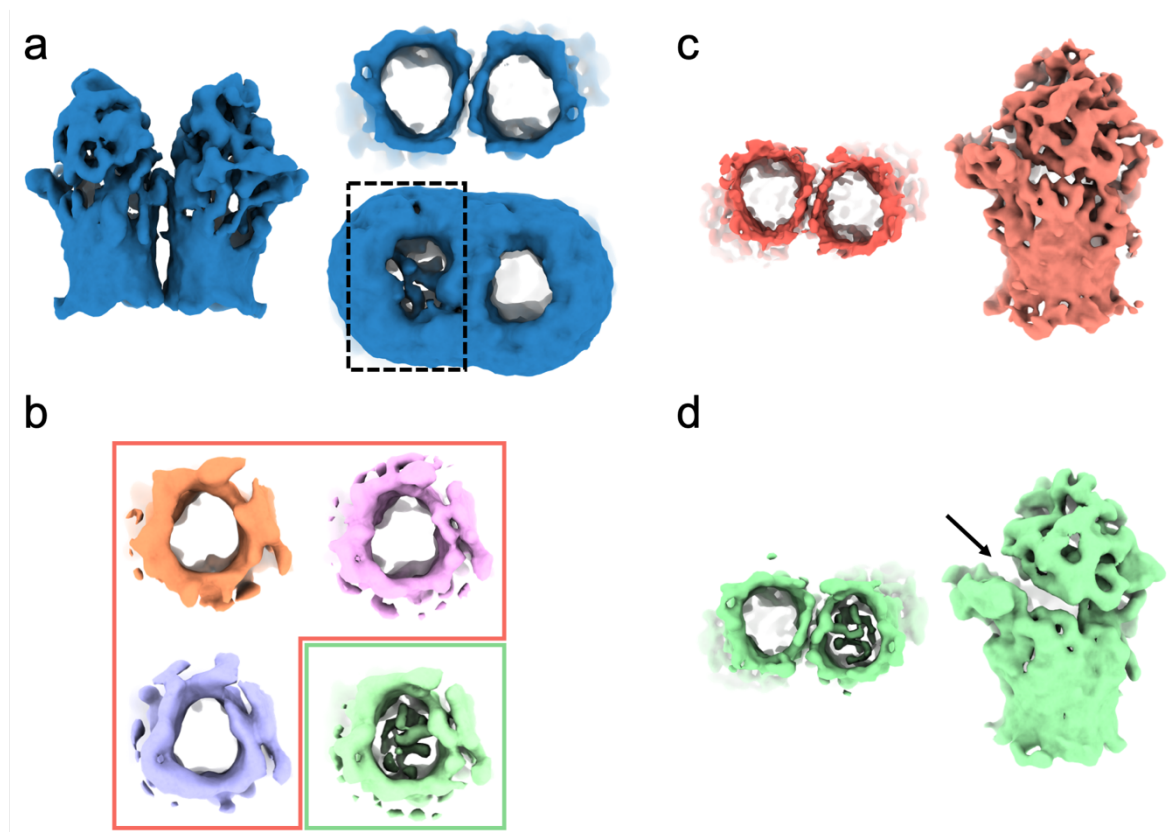

**Supplementary Figure 13** Masked classification approach and outputs. **a**, the closed-closed state observed after global 3D classification viewed in the plane of the membrane (left) and from the periplasm (right). Note that at higher contour levels, density corresponding to the plug domain can be observed in just one of the two Bt1763 barrels. Using the volume eraser tool in Chimera, a mask was generated that encompassed the plugged barrel. ‘Mask create’ in RELION was used to extend this mask by 5 hard and 5 soft pixels. The particle stack contributing to the reconstruction in ‘a’ was subjected to 3D classification with the aforementioned mask applied. Alignment was turned off and the T value was set to 20. This classification successfully separated empty and plugged particles (**b**). Empty and plugged particles were then classified again independently in the absence of a mask. The particles contributing to the best-looking classes were refined and post-processed resulting in the reconstructions shown in **c** and **d**: A ‘true’ closed-closed state lacking density for the plug domain in either barrel (**c**), and a closed-barely open state where clear plug density on only one of the barrels is associated with a partially open position of the Bt1762 lid (**d**).

**Supplementary Table 1** X-ray crystallographic data collection and refinement statistics for Bt1762-63

|                                                         | apo-Bt1763-63              | Bt1762-63<br>+ DP15-25    | Bt1762-63<br>+ DP6-12     |
|---------------------------------------------------------|----------------------------|---------------------------|---------------------------|
| <b>Data collection<sup>#</sup></b>                      |                            |                           |                           |
| Wavelength (Å)                                          | 0.979                      | 0.916                     | 0.978                     |
| Space group                                             | C222 <sub>1</sub>          | C222 <sub>1</sub>         | C222 <sub>1</sub>         |
| Cell dimensions (Å)                                     |                            |                           |                           |
| <i>a</i> , <i>b</i> , <i>c</i> (Å)                      | 116, 233, 171              | 120, 235, 169             | 120, 238, 171             |
| $\alpha$ , $\beta$ , $\gamma$ (°)                       | 90, 90, 90                 | 90, 90, 90                | 90, 90, 90                |
| Resolution (Å)                                          | 96.25-2.62<br>(2.66-2.62)* | 169.2-2.99<br>(3.04-2.99) | 171.0-2.69<br>(2.74-2.69) |
| <i>R</i> <sub>merge</sub>                               | 0.21 (3.08)                | 0.31 (1.92)               | 0.22 (1.50)               |
| <i>R</i> <sub>pim</sub>                                 | 0.084 (1.22)               | 0.13 (0.83)               | 0.085 (0.61)              |
| <i>I</i> / $\sigma$ <i>I</i>                            | 7.0 (0.8)                  | 5.0 (0.7)                 | 6.0 (1.1)                 |
| CC1/2                                                   | 1.00 (0.48)                | 0.96 (0.63)               | 0.99 (0.60)               |
| Completeness (%)                                        | 99.9 (96.8)                | 100 (99.3)                | 100 (100)                 |
| Redundancy                                              | 7.3 (7.1)                  | 7.2 (6.7)                 | 7.2 (6.9)                 |
| Wilson B-factor                                         | 52.4                       | 46.7                      | 46.5                      |
| <b>Refinement</b>                                       |                            |                           |                           |
| Resolution (Å)                                          | 85.6-2.62                  | 106.6-3.1                 | 97.5-2.69                 |
| No. reflections                                         | 69,555                     | 43,398                    | 67,654                    |
| <i>R</i> <sub>work</sub> / <i>R</i> <sub>free</sub> (%) | 21.8/27.5                  | 20.6/26.8                 | 20.8/27.5                 |
| No. atoms                                               |                            |                           |                           |
| Protein                                                 | 10861                      | 11685                     | 11700                     |
| ligands                                                 | -                          | 80                        | 175                       |
| Water                                                   | 80                         | -                         | 243                       |
| <i>B</i> -factors                                       |                            |                           |                           |
| Protein                                                 | 66                         | 70                        | 49                        |
| ligands                                                 | -                          | 77                        | 65                        |
| Water                                                   | 56                         | -                         | 37                        |
| R.m.s. deviations                                       |                            |                           |                           |
| Bond lengths (Å)                                        | 0.009                      | 0.009                     | 0.008                     |
| Bond angles (°)                                         | 1.02                       | 1.19                      | 1.01                      |
| Clashscore                                              | 11.5                       | 13.1                      | 8.2                       |
| Ramachandran plot                                       |                            |                           |                           |
| Favoured (%)                                            | 94.0                       | 90.5                      | 94.1                      |
| Outliers (%)                                            | 0.7                        | 1.0                       | 0.6                       |
| PDB ID                                                  | 6Z8I                       | 6Z9A                      | 6ZAZ                      |

<sup>#</sup> One crystal was used for each data collection.

\* Values in parentheses are for highest-resolution shell.

**Supplementary Table 2** Cryo-EM data collection, refinement and validation statistics for Bt1762-63

|                                                     | Bt1762-63<br>(OO)<br>(6ZLT)<br>(EMD-11273) | Bt1762-63<br>(OC)<br>(6ZM1)<br>(EMD-11277) | Bt1762-63<br>(CC)<br>(6ZLU)<br>(EMD-11274) |
|-----------------------------------------------------|--------------------------------------------|--------------------------------------------|--------------------------------------------|
| <b>Data collection and processing</b>               |                                            |                                            |                                            |
| Magnification                                       | 130,000 x                                  | 130,000 x                                  | 130,000 x                                  |
| Voltage (kV)                                        | 300                                        | 300                                        | 300                                        |
| Electron exposure (e <sup>-</sup> /Å <sup>2</sup> ) | 63.84                                      | 63.84                                      | 63.84                                      |
| Defocus range (μm)                                  | -1.5 to -3.3                               | -1.5 to -3.3                               | -1.5 to -3.3                               |
| Pixel size (Å)                                      | 1.07                                       | 1.07                                       | 1.07                                       |
| Symmetry imposed                                    | C2                                         | C1                                         | C2                                         |
| Initial particle images (no.)                       |                                            | 203,450                                    |                                            |
| Final particle images (no.)                         | 32,190                                     | 22,205                                     | 17,416                                     |
| Map resolution (Å)                                  | 3.9                                        | 4.7                                        | 4.2                                        |
| FSC threshold 0.143                                 |                                            |                                            |                                            |
| Map resolution range (Å)                            | 3.5-5.8                                    | 4.3-8.3                                    | 3.6-7.5                                    |
| <b>Refinement</b>                                   |                                            |                                            |                                            |
| Initial model used (PDB code)                       | 6ZAZ                                       | 6ZAZ                                       | 6Z8I                                       |
| Model resolution (Å)                                | 3.4/3.8                                    | 4.2/5.8                                    | 3.7/7.4                                    |
| FSC threshold (0.143/0.5)                           |                                            |                                            |                                            |
| Model resolution range (Å)                          | ∞ - 3.9                                    | ∞ - 4.7                                    | ∞ - 4.2                                    |
| Map sharpening <i>B</i> factor (Å <sup>2</sup> )    | -110                                       | -138.78                                    | -92.95                                     |
| Model composition                                   |                                            |                                            |                                            |
| Non-hydrogen atoms                                  | 11,425                                     | 22,275                                     | 10,850                                     |
| Protein residues                                    | 1,485                                      | 2,844                                      | 1,359                                      |
| <i>B</i> factors (Å <sup>2</sup> )                  |                                            |                                            |                                            |
| Protein (SusC/SusD)                                 | 36.20                                      | 44.40                                      | 52.61                                      |
| R.m.s. deviations                                   |                                            |                                            |                                            |
| Bond lengths (Å)                                    | 0.005                                      | 0.007                                      | 0.008                                      |
| Bond angles (°)                                     | 0.867                                      | 0.929                                      | 0.988                                      |
| Validation                                          |                                            |                                            |                                            |
| MolProbity score                                    | 1.93                                       | 2.06                                       | 2.08                                       |
| Clashscore                                          | 4.76                                       | 13.46                                      | 17.04                                      |
| Poor rotamers (%)                                   | 1.90                                       | 0.95                                       | 0                                          |
| Ramachandran plot                                   |                                            |                                            |                                            |
| Favored (%)                                         | 92.30                                      | 93.55                                      | 94.91                                      |
| Allowed (%)                                         | 7.70                                       | 6.24                                       | 4.65                                       |
| Disallowed (%)                                      | 0                                          | 0.21                                       | 0.44                                       |

**Supplementary Table 3** Heteronuclear experiments and acquisition parameters used for backbone assignments and structure determination of the BT1763 NTE domain.

| Parameter                           | Experiment                                 |                                            |           |               |              |                    |
|-------------------------------------|--------------------------------------------|--------------------------------------------|-----------|---------------|--------------|--------------------|
|                                     | 2D [ <sup>15</sup> N, <sup>1</sup> H]-HSQC | 2D [ <sup>13</sup> C, <sup>1</sup> H]-HSQC | 3D HNCACB | 3D CBCA(CO)NH | 3D HHN NOESY | 3D HHC NOESY (ali) |
| <sup>1</sup> H frequency (MHz)      | 700                                        | 700                                        | 700       | 700           | 700          | 700                |
| <i>t</i> <sub>1</sub> data points   | 300                                        | 300                                        | 64        | 120           | 280          | 280                |
| <i>t</i> <sub>2</sub> data points   | 2048                                       | 2048                                       | 96        | 100           | 80           | 80                 |
| <i>t</i> <sub>3</sub> data points   | -                                          | -                                          | 2048      | 2048          | 2048         | 2048               |
| <i>t</i> <sub>1</sub> max (ms)      | 52.8                                       | 14.2                                       | 13.2      | 5.6           | 90.9         | 90.9               |
| <i>t</i> <sub>2</sub> max (ms)      | 90.9                                       | 90.9                                       | 4.5       | 17.6          | 14           | 3.78               |
| <i>t</i> <sub>3</sub> max (ms)      | -                                          | -                                          | 104       | 91.7          | 12.4         | 12.4               |
| <i>SW</i> (F1) (ppm)                | 40                                         | 60                                         | 34        | 60            | 16           | 16                 |
| <i>SW</i> (F2) (ppm)                | 16                                         | 16                                         | 60        | 40            | 40           | 60                 |
| <i>SW</i> (F3) (ppm)                | -                                          | -                                          | 14        | 15.94         | 16           | 16                 |
| <i>F</i> <sub>1</sub> carrier (ppm) | 117                                        | 45                                         | 120       | 45            | 4.71         | 4.71               |
| <i>F</i> <sub>2</sub> carrier (ppm) | 4.71                                       | 4.71                                       | 45        | 117           | 118          | 45                 |
| <i>F</i> <sub>3</sub> carrier (ppm) | -                                          | -                                          | 4.74      | 4.71          | 4.71         | 4.71               |
| Interscan delay (s)                 | 0.8                                        | 0.8                                        | 0.8       | 0.9           | 0.8          | 0.8                |
| Number of scans                     | 24                                         | 24                                         | 8         | 8             | 4            | 4                  |
| Mixing time (ms)                    | -                                          | -                                          | -         | -             | 50           | 50                 |

**Supplementary Table 4** NMR structural statistics of the Bt1763 NTE.

|                                              | <b>NTE</b> |
|----------------------------------------------|------------|
| <b>NMR distance and dihedral constraints</b> |            |
| Distance constraints                         |            |
| Total                                        | 964        |
| Intra-residue ( $ i - j  = 0$ )              | 281        |
| Inter-residue                                | 683        |
| Sequential ( $ i - j  = 1$ )                 | 294        |
| Medium-range $1 <  i - j  < 5$               | 70         |
| Long-range ( $ i - j  > 5$ )                 | 319        |
| Hydrogen bonds                               | 0          |
| Total dihedral angle restraints              | 106        |
| $\phi$                                       | 53         |
| $\psi$                                       | 53         |
| <b>Structure statistics</b>                  |            |
| Violations (mean and s.d.)                   |            |
| Distance constraints (Å)                     | 0          |
| Dihedral angle constraints (°)               | 0          |
| Max. dihedral angle violation (°)            | 0          |
| Max. distance constraint violation (Å)       | 0          |
| Ramachandran analysis                        |            |
| Most favored regions                         | 80.1%      |
| Additionally allowed regions                 | 19.8%      |
| Generously allowed regions                   | 0.1%       |
| Disallowed regions                           | 0.0%       |
| Average r.m.s. deviation (Å)                 |            |
| Heavy atom                                   | 1.03       |
| Backbone                                     | 0.52       |
| PDB ID                                       | 6YTC       |

**Supplementary Table 5** Affinity of Bt1762-63 for  $\beta$ 2,6 FOS determined by ITC.

| Ligand <sup>a</sup>                | K <sub>d</sub><br>( $\mu$ M)       | $\Delta$ G<br>(kJ/mol) | $\Delta$ H<br>(kJ/mol) | T $\Delta$ S<br>(kJ/mol) | N <sup>b</sup>       |
|------------------------------------|------------------------------------|------------------------|------------------------|--------------------------|----------------------|
| DP4 (T346)                         | NB <sup>c</sup>                    | -                      | -                      | -                        | -                    |
| DP5 (T319)                         | 30.5<br>( $\pm$ 24.0) <sup>d</sup> | -25.8                  | -5.3<br>( $\pm$ 1.9)   | 20.5                     | 1.4<br>( $\pm$ 0.2)  |
| DP6 (T305)                         | 17.1<br>( $\pm$ 3.8)               | -27.2                  | -17.5<br>( $\pm$ 1.5)  | 9.8                      | 1.2<br>( $\pm$ 0.04) |
| DP8 (T174)                         | 1.4<br>( $\pm$ 0.2)                | -33.4                  | -44.7<br>( $\pm$ 1.8)  | -11.3                    | 0.8<br>( $\pm$ 0.02) |
| DP9 (T159)                         | 1.4<br>( $\pm$ 0.2)                | -33.5                  | -29.2<br>( $\pm$ 1.7)  | 4.3                      | 0.9<br>( $\pm$ 0.02) |
| DP9 (T159) vs<br>W85A <sup>a</sup> | NB <sup>c</sup>                    | -                      | -                      | -                        | -                    |
| DP11 (T146)                        | 1.4<br>( $\pm$ 0.2)                | -33.5                  | -30<br>( $\pm$ 1.4)    | 3.5                      | 1.0<br>( $\pm$ 0.02) |
| ~DP12 (T126)                       | 0.6<br>( $\pm$ 0.2)                | -35.5                  | -20.9<br>( $\pm$ 1.6)  | 14.5                     | 1.6<br>( $\pm$ 0.04) |
| ~DP13 (T118)                       | 0.9<br>( $\pm$ 0.2)                | -34.6                  | -41<br>( $\pm$ 1.2)    | -6.4                     | 1.0<br>( $\pm$ 0.02) |
| ~DP13-14 (T117)                    | 0.7<br>( $\pm$ 0.1)                | -35.2                  | -33.5<br>( $\pm$ 1.0)  | 1.7                      | 1.0<br>( $\pm$ 0.01) |
| ~DP13-14 (T116)                    | 0.8<br>( $\pm$ 0.2)                | -34.7                  | -28.1<br>( $\pm$ 1.4)  | 6.5                      | 1.0<br>( $\pm$ 0.02) |
| >DP14 (T115)                       | 1.2<br>( $\pm$ 0.1)                | -33.8                  | -30<br>( $\pm$ 0.7)    | 3.3                      | 1.0<br>( $\pm$ 0.01) |
| >DP16 (T114)                       | NB <sup>c</sup>                    | -                      | -                      | -                        | -                    |
| >DP16 (T113)                       | NB <sup>c</sup>                    | -                      | -                      | -                        | -                    |

<sup>a</sup>DP of major species of FOS as determined by MS is shown. Fraction used (tube, T) is shown in brackets. DP4-6 are from a different FOS purification compared to the larger DP oligosaccharides. All titrations are with wild-type Bt1762-1763 complex (C-term His-tagged Bt1762), except DP9 vs W85A, which is a mutant of Bt1762 in the complex.

<sup>b</sup>N is number of binding sites on the protein.

<sup>c</sup>NB – no binding detected.

<sup>d</sup>The data presented are from single titrations (shown in Figure 6 and Supplementary Figure 9) and errors shown in parentheses are of the fit to the data. In all cases multiple 'scoping' experiments (between 2 to 4 for each ligand) were carried out to determine the optimum concentration of protein and ligand to use for obtaining a saturating binding isotherm (or confirm lack of binding). These scoping runs were all consistent with the final titration data shown here.

**Supplementary Table 6** Masses of species observed in the native mass spectra shown in Fig. 7b.

| Observed                     | Assignment<br>Protein + adducts           | Number of FOS<br>molecules bound |
|------------------------------|-------------------------------------------|----------------------------------|
| 4uM protein alone            |                                           |                                  |
| 177405.37±0.66               | SusC <sub>1</sub> D <sub>1</sub>          | -                                |
| 354838.36±4.84               | SusC <sub>2</sub> D <sub>2</sub>          | -                                |
| 4uM protein + 25 µM FOS 159  |                                           |                                  |
| 177371.32±8.60               | SusCD                                     | -                                |
| 178523.72±60.43              | SusCD+1152.4                              | 1                                |
| 178673.59±19.31              | SusCD+1301.7                              | 1                                |
| 178847.92±14.21              | SusCD+1476.6                              | 1                                |
| 179009.29±18.78              | SusCD+1638.0                              | 1                                |
| 356435.39±83.14              | SusC <sub>2</sub> D <sub>2</sub> +1692.75 | 1                                |
| 357750.83±3.36               | SusC <sub>2</sub> D <sub>2</sub> +3008.19 | 2                                |
| 357943.83±9.48               | SusC <sub>2</sub> D <sub>2</sub> +3201.19 | 2                                |
| 359404.08±18.00              | SusC <sub>2</sub> D <sub>2</sub> +4661.44 | 3                                |
| 4uM protein + 50 µM FOS 159  |                                           |                                  |
| 177380.33±14.22              | SusCD                                     | -                                |
| 178544.08±1.58               | SusCD+1163.75                             | 1                                |
| 178697.68±7.11               | SusCD+1317.35                             | 1                                |
| 178861.85±6.69               | SusCD+1481.52                             | 1                                |
| 179023.06±14.31              | SusCD+1642.73                             | 1                                |
| 356515.81±27.06              | SusC <sub>2</sub> D <sub>2</sub> +1677.45 | 1                                |
| 357791.44±11.15              | SusC <sub>2</sub> D <sub>2</sub> +2953.08 | 2                                |
| 357980.53±6.36               | SusC <sub>2</sub> D <sub>2</sub> +3219.87 | 2                                |
| 359446.38±1.34               | SusC <sub>2</sub> D <sub>2</sub> +4685.72 | 3                                |
| 360665.22±171.0              | SusC <sub>2</sub> D <sub>2</sub> +5826.86 | 4                                |
| 4uM protein + 100 µM FOS 159 |                                           |                                  |
| 177399.31±9.10               | SusCD                                     | -                                |
| 178543.78±13.78              | SusCD+1163.45                             | 1                                |
| 178710.08±11.09              | SusCD+1329.75                             | 1                                |
| 178878.88±12.17              | SusCD+1498.55                             | 1                                |
| 179046.44±11.71              | SusCD+1666.11                             | 1                                |
| 180366.35±12.78              | SusCD+2986.02                             | 2                                |
| 180203.41±14.05              | SusCD+2823.08                             | 2                                |
| 180672.93±26.94              | SusCD+3292.60                             | 2                                |
| 357823.34±28.59              | SusC <sub>2</sub> D <sub>2</sub> +2984.98 | 2                                |
| 357987.55±31.87              | SusC <sub>2</sub> D <sub>2</sub> +3149.19 | 2                                |
| 359488.15±70.86              | SusC <sub>2</sub> D <sub>2</sub> +4649.79 | 3                                |
| 360839.11±105.09             | SusC <sub>2</sub> D <sub>2</sub> +6001.11 | 4                                |
| 361151.03±174.06             | SusC <sub>2</sub> D <sub>2</sub> +6312.67 | 4                                |

**Supplementary Table 7** Primers used to construct Bt1762-63 SusCD mutants.

| <b>Name</b> | <b>Sequence</b>                                         |
|-------------|---------------------------------------------------------|
| TB-fwd      | AAAGAAGATAACATTCGAGTCGACCTACGGGAGCATG                   |
| TBD-rev     | CTTTACGCTGTGTAGTATAATCTACCATCTGGGTATC                   |
| TBD-fwd     | GATACCCAGATGGTAGATTATACTACACAGCGTAAAG                   |
| TB-rev      | GGTGGCGGCCGCTCTAGAGAGGGTTACGACGGT                       |
| TBM-rev     | CTTTACGCTGTGTAGTATAAGCAGCAGCAGCAGCAGCATCTACCATCTGGGTATC |
| TBM-fwd     | GATACCCAGATGGTAGATGCTGCTGCTGCTGCTGCTTATACTACACAGCGTAAAG |
| Hinge-fwd   | AAAGAAGATAACATTCGAGTCGACACAATCTTTCCGTCAGCA              |
| H2D-rev     | CGAATTTATACCAGTCAGGATATCTGTTGCTTTC                      |
| H2D-fwd     | ATCCTGACTGGTATAAATTCGGGTGCAATG                          |
| Hinge-rev   | CACCGCGGTGGCGGCCGCTCTAGAGATCATTCTTTTATTGA               |
| H1D-rev     | TTTGAAACCACCAGGTGCATAGATAGTATAACGGGC                    |
| H1D-fwd     | TATGCACCTGGTGGTTTCAAACGCAACCAGATCGGT                    |
| Trp1-fwd    | AAAGAAGATAACATTCGAGTCGACGAAGAGTGTAGTCGGACATAC           |
| Trp2-rev    | ATTGATATTCGCGTCGGTGGTATTGATACC                          |
| Trp3-fwd    | ACCACCGACGCGAATATCAATGATATATGG                          |
| Trp4-rev    | CACCGCGGTGGCGGCCGCTCTAGACTGAATCAGTGCTTCGGCAC            |
| NTE1-fwd    | AAAGAAGATAACATTCGAGTCGACCTACGGGAGCATG                   |
| NTE2-rev    | AACTTCATCTACCATCTGAATGTTTTGCCCCACAG                     |
| NTE3-fwd    | CTGTGGGGGCAAACATTCAGATGGTAGATGAAGTT                     |
| NTE4-rev    | GGTGGCGGCCGCTCTAGAGAGGGTTACGACGGT                       |
